# Supplementary material for: «Salivaomics» of Different Molecular Biological Subtypes of Breast Cancer
Source: MDPI journal article supplement (doi:10.3390/cimb44070211), 2022-07-05
Supplement: s1 [file s1]

**Table S1.** Biochemical composition of saliva for Luminal B-like breast cancer compared with the control group

| Indicator                    | Control Group, n=298   | Luminal B-like (HER2+), n=230 | Luminal B-like (HER2-), n=63 |
|------------------------------|------------------------|-------------------------------|------------------------------|
| pH                           | 6.48 [6.30; 6.71]      | 6.48 [6.23; 6.70]             | 6.47 [6.21; 6.73]            |
| Calcium, mmol/L              | 1.28 [1.04; 1.59]      | 1.22 [0.86; 1.60]             | 1.26 [0.86; 1.72]            |
| Phosphorus, mmol/L           | 4.33 [3.35; 5.72]      | 4.65 [3.62; 5.94]**           | 4.71 [4.01; 6.07]*           |
| Ca/P-ratio, c.u.             | 0.287 [0.220; 0.389]   | 0.263 [0.191; 0.341]*         | 0.252 [0.182; 0.387]         |
| Sodium, mmol/L               | 8.35 [5.55; 12.09]     | 7.31 [4.57; 12.14]            | 9.01 [5.87; 17.03]           |
| Potassium, mmol/L            | 10.76 [8.76; 14.20]    | 10.99 [8.18; 14.06]           | 13.08 [10.37; 14.79]**       |
| Na/K-ratio, c.u.             | 0.751 [0.505; 1.190]   | 0.646 [0.466; 0.970]**        | 0.650 [0.467; 1.140]         |
| Chlorides, mmol/L            | 25.71 [20.93; 31.50]   | 25.20 [20.22; 31.49]          | 27.42 [21.65; 36.40]         |
| Magnesium, mmol/L            | 0.302 [0.242; 0.360]   | 0.300 [0.227; 0.371]          | 0.302 [0.237; 0.432]         |
| NO, µmol/L                   | 23.51 [13.51; 40.70]   | 28.60 [16.84; 45.96]*         | 33.07 [17.37; 50.00]*        |
| Protein, mg/mL               | 0.79 [0.49; 1.23]      | 0.62 [0.38; 1.02]*            | 0.68 [0.37; 1.02]            |
| Urea, mmol/L                 | 6.86 [4.52; 9.47]      | 9.78 [6.03; 13.35]*           | 10.04 [7.23; 16.28]*         |
| Uric acid, µmol/L            | 90.38 [34.62; 151.38]  | 59.62 [23.08; 133.03]*        | 70.56 [21.93; 145.24]        |
| Lactic acid, mmol/L          | 1.70 [1.31; 2.03]      | 1.65 [1.40; 2.01]             | 1.60 [1.38; 1.96]            |
| Pyruvic acid, µmol/L         | 13.73 [9.56; 19.85]    | 13.97 [9.80; 19.00]           | 15.20 [10.29; 21.32]         |
| Albumin, mg/mL               | 0.270 [0.182; 0.459]   | 0.294 [0.181; 0.510]          | 0.378 [0.197; 0.653]*        |
| α-Aminoacids, mmol/L         | 4.03 [3.75; 4.31]      | 4.22 [3.92; 4.81]*            | 4.40 [3.95; 5.09]*           |
| Imidazole compounds, mmol/L  | 0.288 [0.182; 0.395]   | 0.277 [0.182; 0.395]          | 0.326 [0.175; 0.478]         |
| Sialic acids, mmol/L         | 0.177 [0.128; 0.275]   | 0.201 [0.146; 0.281]**        | 0.201 [0.153; 0.275]         |
| Seromucoids, c.u.            | 0.091 [0.062; 0.134]   | 0.097 [0.059; 0.145]          | 0.099 [0.069; 0.179]*        |
| ALT, U/L                     | 3.85 [2.77; 5.08]      | 4.23 [3.00; 5.62]*            | 4.08 [3.08; 4.92]            |
| AST, U/L                     | 5.58 [3.58; 7.50]      | 6.17 [4.33; 8.67]*            | 6.50 [4.58; 8.08]*           |
| AST/ALT-ratio, c.u.          | 1.38 [1.11; 1.85]      | 1.40 [1.14; 1.83]             | 1.65 [1.22; 2.09]*           |
| LDH, U/L                     | 1076.0 [599.5; 1875.0] | 1418.0 [837.7; 2022.0]*       | 1126.0 [642.3; 2117.0]       |
| ALP, U/L                     | 63.02 [43.46; 91.27]   | 67.36 [45.63; 97.79]          | 91.27 [54.33; 123.86]*       |
| GGT, U/L                     | 20.8 [17.6; 24.4]      | 23.4 [20.3; 26.1]*            | 24.4 [19.8; 27.0]*           |
| Catalase, nkat/mL            | 4.44 [3.38; 5.69]      | 3.44 [2.46; 5.66]*            | 4.78 [2.46; 6.85]            |
| Superoxide dismutase, c.u.   | 57.89 [31.58; 105.26]  | 76.32 [34.21; 157.89]*        | 84.21 [38.16; 130.26]*       |
| α-Amylase, U/L               | 185.2 [83.5; 384.4]    | 305.7 [122.6; 564.8]*         | 446.2 [244.7; 833.0]*        |
| Antioxidant activity, mmol/L | 2.36 [1.53; 3.65]      | 2.34 [1.49; 3.53]             | 2.48 [1.71; 3.38]            |
| Peroxidase, c.u.             | 0.365 [0.170; 0.670]   | 0.400 [0.230; 0.830]          | 0.425 [0.230; 0.900]         |
| SOD/Catalase-ratio, c.u.     | 14.29 [6.62; 28.70]    | 21.95 [9.08; 43.46]*          | 21.91 [9.84; 38.73]*         |
| SOD/Peroxidase-ratio, c.u.   | 122.60 [60.31; 246.71] | 137.84 [65.19; 296.05]        | 231.64 [101.21; 442.11]*     |
| Diene conjugates, c.u.       | 3.95 [3.80; 4.11]      | 3.94 [3.71; 4.13]             | 3.84 [3.73; 4.07]*           |
| Triene conjugates, c.u.      | 0.886 [0.793; 0.971]   | 0.879 [0.797; 1.000]          | 0.878 [0.805; 0.985]         |
| Schiff bases, c.u.           | 0.537 [0.493; 0.570]   | 0.540 [0.483; 0.623]          | 0.519 [0.476; 0.609]         |
| MDA, µmol/L                  | 6.67 [5.73; 8.21]      | 7.09 [5.81; 8.63]**           | 7.31 [6.07; 9.83]*           |
| SB/(DC+TC)-ratio, c.u.       | 0.111 [0.104; 0.116]   | 0.111 [0.102; 0.124]          | 0.109 [0.100; 0.124]         |
| SB/TC-ratio, c.u.            | 0.603 [0.560; 0.656]   | 0.613 [0.559; 0.679]          | 0.597 [0.537; 0.686]         |
| MM 254, c.u.                 | 0.261 [0.175; 0.381]   | 0.247 [0.167; 0.364]          | 0.275 [0.166; 0.410]         |
| MM 280, c.u.                 | 0.219 [0.147; 0.321]   | 0.201 [0.142; 0.319]          | 0.196 [0.135; 0.337]         |
| MM 280/254                   | 0.843 [0.757; 0.949]   | 0.850 [0.775; 0.951]          | 0.869 [0.783; 0.953]         |

**Note.** \* - differences with the control group are statistically significant at p<0.05; \*\* - differences with the control group are statistically significant at p<0.10.

**Table S2.** Biochemical composition of saliva for Luminal A-like, Non-Luminal and Basal-like breast cancer compared with the control group

| Indicator                    | Luminal A-like, n=64     | Non-Luminal (HER2+), n=38 | Basal-like (Triple-negative), n=28 |
|------------------------------|--------------------------|---------------------------|------------------------------------|
| pH                           | 6.52 [6.26; 6.84]        | 6.40 [6.20; 6.68]         | 6.55 [6.43; 6.75]                  |
| Calcium, mmol/L              | 1.39 [0.95; 1.65]        | 1.15 [0.92; 1.40]*        | 1.13 [0.73; 1.82]                  |
| Phosphorus, mmol/L           | 4.36 [3.22; 6.04]        | 4.10 [2.49; 5.51]         | 4.75 [3.09; 7.49]                  |
| Ca/P-ratio, c.u.             | 0.289 [0.199; 0.405]     | 0.270 [0.210; 0.371]      | 0.229 [0.156; 0.342]*              |
| Sodium, mmol/L               | 6.56 [4.27; 12.39]**     | 7.08 [5.31; 12.51]        | 8.77 [6.46; 13.02]                 |
| Potassium, mmol/L            | 10.63 [7.43; 15.43]      | 11.34 [4.50; 13.54]       | 13.24 [10.18; 17.66]*              |
| Na/K-ratio, c.u.             | 0.635 [0.492; 0.975]     | 0.776 [0.489; 1.255]      | 0.624 [0.408; 1.085]               |
| Chlorides, mmol/L            | 24.72 [18.08; 32.24]     | 25.17 [21.10; 30.80]      | 29.01 [24.76; 35.56]*              |
| Magnesium, mmol/L            | 0.282 [0.210; 0.372]     | 0.298 [0.209; 0.398]      | 0.280 [0.194; 0.403]               |
| NO, µmol/L                   | 28.77 [21.32; 42.19]*    | 35.09 [18.60; 44.56]      | 27.98 [22.63; 38.86]               |
| Protein, mg/mL               | 0.59 [0.32; 1.36]        | 0.70 [0.36; 1.08]         | 0.74 [0.37; 1.18]                  |
| Urea, mmol/L                 | 9.12 [5.95; 14.02]*      | 9.32 [5.25; 11.28]*       | 9.67 [6.61; 13.56]*                |
| Uric acid, µmol/L            | 64.36 [32.22; 130.56]    | 82.05 [30.37; 133.33]     | 92.71 [17.00; 155.65]              |
| Lactic acid, mmol/L          | 1.88 [1.43; 2.22]        | 1.62 [1.39; 2.14]         | 1.68 [1.38; 2.20]                  |
| Pyruvic acid, µmol/L         | 13.48 [8.58; 17.89]      | 14.46 [10.78; 20.59]      | 14.95 [12.50; 22.06]               |
| Albumin, mg/mL               | 0.310 [0.149; 0.494]     | 0.350 [0.154; 0.590]      | 0.271 [0.197; 0.530]               |
| α-Aminoacids, mmol/L         | 4.18 [3.83; 4.74]*       | 4.24 [3.84; 4.76]**       | 4.30 [3.86; 5.28]*                 |
| Imidazole compounds, mmol/L  | 0.266 [0.167; 0.357]     | 0.281 [0.235; 0.349]      | 0.300 [0.224; 0.391]               |
| Sialic acids, mmol/L         | 0.177 [0.134; 0.305]     | 0.168 [0.098; 0.244]      | 0.244 [0.171; 0.299]**             |
| Seromucoids, c.u.            | 0.099 [0.058; 0.171]     | 0.094 [0.064; 0.156]      | 0.099 [0.076; 0.168]               |
| ALT, U/L                     | 3.92 [2.46; 5.77]        | 4.46 [2.62; 5.77]         | 4.23 [3.31; 8.92]*                 |
| AST, U/L                     | 6.50 [4.50; 9.67]*       | 6.17 [4.17; 8.50]         | 7.08 [5.83; 9.92]*                 |
| AST/ALT-ratio, c.u.          | 1.61 [1.22; 1.96]**      | 1.55 [1.07; 2.17]         | 1.74 [1.15; 2.07]                  |
| LDH, U/L                     | 1540.0 [1118.0; 2114.5]* | 1778.5 [1128.0; 2236.0]*  | 1305.0 [832.8; 2121.0]             |
| ALP, U/L                     | 71.71 [47.81; 102.13]    | 78.23 [54.33; 108.65]*    | 84.86 [49.98; 148.85]*             |
| GGT, U/L                     | 22.6 [19.7; 26.2]*       | 21.3 [19.1; 24.6]         | 23.6 [20.6; 27.6]*                 |
| Catalase, nkat/mL            | 3.78 [2.68; 5.22]*       | 3.96 [2.89; 6.39]         | 3.63 [2.10; 6.03]**                |
| Superoxide dismutase, c.u.   | 59.21 [21.05; 86.84]     | 67.11 [42.11; 115.79]     | 73.68 [50.00; 165.79]**            |
| α-Amylase, U/L               | 297.6 [116.5; 579.0]*    | 223.2 [117.6; 649.8]      | 297.2 [115.4; 524.8]               |
| Antioxidant activity, mmol/L | 2.03 [1.18; 2.93]**      | 2.10 [1.54; 3.29]         | 2.42 [1.55; 3.44]                  |
| Peroxidase, c.u.             | 0.330 [0.210; 0.755]     | 0.680 [0.470; 1.170]*     | 0.440 [0.335; 0.780]               |
| SOD/Catalase-ratio, c.u.     | 14.74 [7.41; 23.95]      | 19.57 [6.88; 36.96]       | 25.77 [11.17; 43.90]*              |
| SOD/Peroxidase-ratio, c.u.   | 110.80 [29.51; 224.17]   | 79.74 [30.96; 112.34]*    | 186.07 [69.72; 567.43]             |
| Diene conjugates, c.u.       | 3.83 [3.65; 4.09]*       | 3.98 [3.79; 4.25]         | 4.02 [3.77; 4.24]                  |
| Triene conjugates, c.u.      | 0.944 [0.811; 1.065]*    | 0.903 [0.810; 0.990]      | 0.895 [0.769; 1.011]               |
| Schiff bases, c.u.           | 0.591 [0.475; 0.762]*    | 0.553 [0.492; 0.735]**    | 0.519 [0.475; 0.683]               |
| MDA, µmol/L                  | 6.75 [5.64; 7.86]        | 6.97 [6.03; 10.00]        | 9.06 [6.75; 9.91]*                 |
| SB/(DC+TC)-ratio, c.u.       | 0.118 [0.104; 0.160]*    | 0.111 [0.102; 0.139]      | 0.110 [0.099; 0.124]               |
| SB/TC-ratio, c.u.            | 0.647 [0.573; 0.731]*    | 0.647 [0.579; 0.727]*     | 0.622 [0.560; 0.736]               |
| MM 254, c.u.                 | 0.212 [0.139; 0.338]*    | 0.266 [0.167; 0.426]      | 0.324 [0.210; 0.443]               |
| MM 280, c.u.                 | 0.182 [0.129; 0.322]**   | 0.206 [0.157; 0.352]      | 0.267 [0.177; 0.398]               |
| MM 280/254                   | 0.867 [0.789; 1.017]     | 0.851 [0.768; 0.940]      | 0.880 [0.780; 0.963]               |

**Note.** \* - differences with the control group are statistically significant at p<0.05; \*\* - differences with the control group are statistically significant at p<0.10.

**Table S3.** Biochemical composition of saliva in HER2-positive and HER2-negative breast cancer

| Indicator                    | HER2-negative, n=156   | p-value<br>HER2-neg<br>vs. Control | HER2-positive, n=276   | p-value<br>HER2-pos<br>vs. Control | p-value<br>HER2-neg vs.<br>HER2-pos |
|------------------------------|------------------------|------------------------------------|------------------------|------------------------------------|-------------------------------------|
| pH                           | 6.50 [6.22; 6.76]      | 0.4551                             | 6.45 [6.22; 6.69]      | 0.2622                             | 0.1374                              |
| Calcium, mmol/L              | 1.28 [0.92; 1.75]      | 0.8454                             | 1.20 [0.86; 1.56]      | 0.0236*                            | 0.0694**                            |
| Phosphorus, mmol/L           | 4.68 [3.47; 6.13]      | 0.0767**                           | 4.53 [3.54; 5.87]      | 0.3180                             | 0.3295                              |
| Ca/P-ratio, c.u.             | 0.27 [0.19; 0.39]      | 0.1171                             | 0.26 [0.19; 0.35]      | 0.0051*                            | 0.5106                              |
| Sodium, mmol/L               | 8.1 [4.9; 13.1]        | 0.4576                             | 7.4 [4.7; 12.5]        | 0.1468                             | 0.6763                              |
| Potassium, mmol/L            | 12.1 [9.1; 15.2]       | 0.1710                             | 11.0 [8.1; 14.1]       | 0.5298                             | 0.0956**                            |
| Na/K-ratio, c.u.             | 0.63 [0.47; 1.04]      | 0.0825**                           | 0.69 [0.47; 1.08]      | 0.2059                             | 0.6118                              |
| Chlorides, mmol/L            | 27.4 [19.5; 35.2]      | 0.2235                             | 25.1 [20.2; 31.5]      | 0.6884                             | 0.1702                              |
| Magnesium, mmol/L            | 0.293 [0.217; 0.390]   | 0.8280                             | 0.298 [0.227; 0.371]   | 0.7018                             | 0.8929                              |
| NO, $\mu$ mol/L              | 30.0 [21.1; 46.3]      | 0.0070*                            | 28.6 [16.8; 46.0]      | 0.0215*                            | 0.5521                              |
| Protein, mg/mL               | 0.64 [0.35; 1.10]      | 0.0320*                            | 0.61 [0.37; 1.02]      | 0.0026*                            | 0.9007                              |
| Urea, mmol/L                 | 9.60 [6.74; 14.29]     | 0.0000*                            | 9.78 [6.02; 13.07]     | 0.0000*                            | 0.2925                              |
| Uric acid, $\mu$ mol/L       | 67.61 [25.25; 142.50]  | 0.1053                             | 59.62 [22.94; 132.50]  | 0.0006*                            | 0.2399                              |
| Lactic acid, mmol/L          | 1.68 [1.38; 2.14]      | 0.5562                             | 1.63 [1.41; 2.03]      | 0.9119                             | 0.4967                              |
| Pyruvic acid, $\mu$ mol/L    | 14.58 [10.05; 19.61]   | 0.4608                             | 13.97 [9.56; 19.36]    | 0.9929                             | 0.4726                              |
| Albumin, mg/mL               | 0.312 [0.182; 0.590]   | 0.1646                             | 0.296 [0.178; 0.514]   | 0.5986                             | 0.3815                              |
| $\alpha$ -Aminoacids, mmol/L | 4.30 [3.89; 4.94]      | 0.0000*                            | 4.22 [3.90; 4.78]      | 0.0000*                            | 0.8634                              |
| Imidazole compounds, mmol/L  | 0.281 [0.175; 0.417]   | 0.9141                             | 0.281 [0.190; 0.395]   | 0.6311                             | 0.7906                              |
| Sialic acids, mmol/L         | 0.201 [0.140; 0.281]   | 0.1173                             | 0.198 [0.140; 0.272]   | 0.1867                             | 0.6845                              |
| Seromucoids, c.u.            | 0.100 [0.069; 0.176]   | 0.0239*                            | 0.096 [0.061; 0.142]   | 0.5072                             | 0.1104                              |
| ALT, U/L                     | 4.00 [3.08; 5.46]      | 0.0955**                           | 4.08 [2.92; 5.50]      | 0.0182*                            | 0.8454                              |
| AST, U/L                     | 6.71 [4.58; 8.83]      | 0.0002*                            | 6.17 [4.25; 8.58]      | 0.0037*                            | 0.2239                              |
| AST/ALT-ratio, c.u.          | 1.65 [1.22; 2.04]      | 0.0052*                            | 1.43 [1.13; 1.89]      | 0.6235                             | 0.0200*                             |
| LDH, U/L                     | 1449.0 [832.8; 2114.5] | 0.0035*                            | 1454.0 [885.3; 2039.0] | 0.0005*                            | 0.9183                              |
| ALP, U/L                     | 80.40 [47.81; 117.34]  | 0.0022*                            | 69.54 [45.63; 99.96]   | 0.2070                             | 0.0487*                             |
| GGT, U/L                     | 23.4 [19.9; 27.2]      | 0.0000*                            | 23.2 [20.2; 26.0]      | 0.0000*                            | 0.5051                              |
| Catalase, nkat/mL            | 4.06 [2.48; 6.13]      | 0.0822**                           | 3.46 [2.53; 5.71]      | 0.0000*                            | 0.1752                              |
| Superoxide dismutase, c.u.   | 73.7 [36.8; 123.7]     | 0.0677**                           | 73.7 [34.2; 147.4]     | 0.0077*                            | 0.5667                              |
| $\alpha$ -Amylase, U/L       | 341.4 [143.3; 647.6]   | 0.0014*                            | 295.8 [120.1; 582.4]   | 0.0038*                            | 0.4163                              |
| Antioxidant activity, mmol/L | 2.41 [1.55; 3.34]      | 0.4052                             | 2.34 [1.49; 3.47]      | 0.4335                             | 0.7950                              |
| Peroxidase, c.u.             | 0.425 [0.230; 0.800]   | 0.3032                             | 0.480 [0.280; 0.840]   | 0.0534**                           | 0.5633                              |
| SOD/Catalase-ratio, c.u.     | 19.4 [8.4; 31.8]       | 0.0294*                            | 21.1 [8.9; 41.7]       | 0.0002*                            | 0.2921                              |
| SOD/Peroxidase-ratio, c.u.   | 172.1 [88.3; 404.9]    | 0.0737**                           | 130.4 [52.2; 265.8]    | 0.8490                             | 0.0856**                            |
| Diene conjugates, c.u.       | 3.87 [3.71; 4.10]      | 0.0276*                            | 3.94 [3.72; 4.13]      | 0.6516                             | 0.1857                              |
| Triene conjugates, c.u.      | 0.909 [0.803; 1.030]   | 0.0459*                            | 0.884 [0.796; 1.000]   | 0.4801                             | 0.1794                              |
| Schiff bases, c.u.           | 0.536 [0.476; 0.718]   | 0.1199                             | 0.540 [0.486; 0.628]   | 0.0902**                           | 0.5608                              |
| MDA, $\mu$ mol/L             | 7.09 [5.90; 9.40]      | 0.0128*                            | 7.09 [5.81; 8.80]      | 0.0207*                            | 0.5357                              |
| SB/(DC+TC)-ratio, c.u.       | 0.111 [0.100; 0.143]   | 0.1566                             | 0.111 [0.102; 0.125]   | 0.2928                             | 0.4592                              |
| SB/TC-ratio, c.u.            | 0.627 [0.553; 0.723]   | 0.0704**                           | 0.617 [0.561; 0.682]   | 0.0911**                           | 0.5733                              |
| MM 254, c.u.                 | 0.254 [0.164; 0.375]   | 0.6257                             | 0.245 [0.167; 0.389]   | 0.3914                             | 0.8722                              |

|              |                      |                 |                      |        |        |
|--------------|----------------------|-----------------|----------------------|--------|--------|
| MM 280, c.u. | 0.206 [0.135; 0.337] | 0.6851          | 0.199 [0.141; 0.323] | 0.4737 | 0.9205 |
| MM 280/254   | 0.867 [0.783; 0.973] | <b>0.0659**</b> | 0.850 [0.775; 0.951] | 0.3896 | 0.2090 |

**Note.** \* - differences are statistically significant at  $p < 0.05$ ; \*\* - differences are statistically significant at  $p < 0.10$ .

**Table S4.** Biochemical composition of saliva in HER2-positive (+, ++, +++) breast cancer

| Indicator                    | HER2(+), n=124                 | HER2(++), n=83         | HER2(+++), n=69        | Kruskal-Wallis test (H, p) |
|------------------------------|--------------------------------|------------------------|------------------------|----------------------------|
| pH                           | 6.45 [6.26; 6.69]              | 6.45 [6.22; 6.69]      | 6.43 [6.19; 6.70]      | 1.634; 0.6517              |
| Calcium, mmol/L              | 1.20 [0.80; 1.51]              | 1.23 [1.00; 1.61]      | 1.14 [0.84; 1.57]      | 3.957; 0.2662              |
| Phosphorus, mmol/L           | 4.96 [3.49; 6.00]              | 4.55 [3.75; 5.55]      | 4.07 [2.98; 5.48]      | 4.229; 0.2377              |
| Ca/P-ratio, c.u.             | 0.25 [0.18; 0.34]              | 0.27 [0.21; 0.34]      | 0.27 [0.21; 0.37]      | <b>6.507; 0.0894**</b>     |
| Sodium, mmol/L               | 7.4 [5.1; 11.8]                | 6.7 [4.5; 12.5]        | 7.7 [5.4; 12.9]        | 2.959; 0.3981              |
| Potassium, mmol/L            | 11.3 [8.8; 14.6]               | 10.2 [7.4; 13.5]       | 10.8 [6.9; 13.3]       | 3.003; 0.3911              |
| Na/K-ratio, c.u.             | 0.65 [0.47; 0.92]              | 0.70 [0.47; 1.41]      | 0.71 [0.47; 1.52]      | 3.702; 0.2955              |
| Chlorides, mmol/L            | 24.5 [20.0; 32.5]              | 24.9 [19.6; 30.4]      | 26.2 [21.3; 32.3]      | 2.197; 0.5325              |
| Magnesium, mmol/L            | 0.292 [0.220; 0.371]           | 0.304 [0.236; 0.371]   | 0.298 [0.215; 0.369]   | 0.5998; 0.8965             |
| NO, $\mu$ mol/L              | 33.3 [17.4; 46.0]              | 26.8 [16.7; 48.1]      | 27.9 [13.2; 40.4]      | <b>10.74; 0.0132*</b>      |
| Protein, mg/mL               | 0.66 [0.42; 1.12]              | 0.57 [0.35; 1.02]      | 0.60 [0.36; 0.98]      | <b>65.93; 0.0000*</b>      |
| Urea, mmol/L                 | 9.60 [6.15; 12.96]             | 9.56 [6.00; 14.18]     | 9.89 [6.03; 12.27]     | <b>47.17; 0.0000*</b>      |
| Uric acid, $\mu$ mol/L       | 54.46 [23.44; 130.67]          | 54.82 [26.21; 126.15]  | 77.88 [17.43; 134.65]  | <b>9.033; 0.0289*</b>      |
| Lactic acid, mmol/L          | 1.71 [1.41; 2.18]              | 1.60 [1.31; 1.85]      | 1.64 [1.47; 1.94]      | 4.807; 0.1865              |
| Pyruvic acid, $\mu$ mol/L    | 14.83 [10.17; 19.73]           | 12.99 [9.80; 19.12]    | 12.99 [7.72; 19.00]    | 3.359; 0.3395              |
| Albumin, mg/mL               | <b>0.321 [0.198; 0.607]***</b> | 0.249 [0.158; 0.419]   | 0.298 [0.153; 0.456]   | <b>6.445; 0.0919**</b>     |
| $\alpha$ -Aminoacids, mmol/L | 4.19 [3.92; 5.06]              | 4.15 [3.90; 4.63]      | 4.29 [3.86; 4.81]      | <b>19.33; 0.0002*</b>      |
| Imidazole compounds, mmol/L  | 0.277 [0.193; 0.395]           | 0.273 [0.152; 0.387]   | 0.296 [0.193; 0.410]   | 4.237; 0.2370              |
| Sialic acids, mmol/L         | 0.192 [0.140; 0.269]           | 0.191 [0.134; 0.302]   | 0.204 [0.134; 0.262]   | 0.2740; 0.9648             |
| Seromucoids, c.u.            | 0.100 [0.061; 0.160]           | 0.094 [0.056; 0.133]   | 0.092 [0.062; 0.133]   | 1.624; 0.6539              |
| ALT, U/L                     | 4.46 [3.54; 5.77]              | 3.92 [2.69; 5.30]      | 3.73 [2.62; 5.00]      | 3.082; 0.3791              |
| AST, U/L                     | 7.17 [4.67; 9.75]              | 5.67 [4.17; 7.50]      | 5.79 [3.96; 8.50]      | 2.709; 0.4386              |
| AST/ALT-ratio, c.u.          | 1.44 [1.10; 1.90]              | 1.35 [1.13; 1.77]      | 1.48 [1.15; 1.97]      | 1.449; 0.6940              |
| LDH, U/L                     | 1595.5 [987.1; 2052.5]         | 1529.0 [781.7; 2019.0] | 1347.0 [753.5; 2018.0] | <b>11.53; 0.0092*</b>      |
| ALP, U/L                     | 71.71 [48.89; 102.13]          | 69.54 [41.29; 99.96]   | 67.36 [45.63; 97.79]   | 4.751; 0.1909              |
| GGT, U/L                     | 23.4 [21.1; 26.7]              | 22.8 [19.8; 24.9]      | 23.0 [19.8; 26.2]      | <b>30.44; 0.0000*</b>      |
| Catalase, nkat/mL            | 3.80 [2.66; 5.75]              | 3.33 [2.34; 5.39]      | 3.24 [2.44; 5.65]      | <b>15.44; 0.0015*</b>      |
| Superoxide dismutase, c.u.   | 71.05 [34.21; 139.47]          | 65.79 [31.58; 139.47]  | 81.58 [42.11; 152.63]  | 5.720; 0.1260              |
| $\alpha$ -Amylase, U/L       | 423.1 [133.0; 605.3]           | 242.1 [114.0; 404.2]   | 297.9 [115.6; 674.7]   | <b>11.04; 0.0115*</b>      |
| Antioxidant activity, mmol/L | 2.62 [1.61; 3.42]              | 2.43 [1.18; 3.58]      | 2.14 [1.59; 3.51]      | 0.9100; 0.8230             |
| Peroxidase, c.u.             | 0.560 [0.300; 1.050]           | 0.370 [0.240; 0.690]   | 0.480 [0.290; 0.720]   | 3.755; 0.2892              |
| SOD/Catalase-ratio, c.u.     | 20.9 [7.0; 36.1]               | 19.2 [7.4; 41.5]       | 23.4 [9.9; 51.5]       | <b>7.369; 0.0541**</b>     |
| SOD/Peroxidase-ratio, c.u.   | 129.2 [52.2; 276.7]            | 160.8 [51.0; 270.3]    | 106.0 [50.2; 245.6]    | 1.582; 0.6634              |
| Diene conjugates, c.u.       | 3.97 [3.79; 4.20]              | 3.92 [3.70; 4.16]      | 3.94 [3.68; 4.07]      | 5.398; 0.1449              |
| Triene conjugates, c.u.      | 0.897 [0.805; 1.021]           | 0.865 [0.786; 1.000]   | 0.858 [0.795; 0.969]   | 1.566; 0.6672              |
| Schiff bases, c.u.           | 0.555 [0.496; 0.621]           | 0.531 [0.476; 0.650]   | 0.518 [0.483; 0.613]   | 2.385; 0.4965              |
| MDA, $\mu$ mol/L             | 7.35 [5.98; 8.85]              | 6.92 [5.73; 8.38]      | 7.09 [5.73; 9.87]      | <b>11.84; 0.0079*</b>      |
| SB/(DC+TC)-ratio, c.u.       | 0.112 [0.101; 0.124]           | 0.110 [0.102; 0.129]   | 0.110 [0.102; 0.120]   | 2.237; 0.5248              |
| SB/TC-ratio, c.u.            | 0.628 [0.562; 0.682]           | 0.615 [0.561; 0.684]   | 0.609 [0.556; 0.679]   | 1.350; 0.7173              |
| MM 254, c.u.                 | 0.268 [0.170; 0.389]           | 0.240 [0.150; 0.310]   | 0.241 [0.167; 0.428]   | 5.311; 0.1504              |

|              |                      |                      |                      |               |
|--------------|----------------------|----------------------|----------------------|---------------|
| MM 280, c.u. | 0.217 [0.142; 0.352] | 0.189 [0.125; 0.269] | 0.180 [0.149; 0.360] | 4.608; 0.2029 |
| MM 280/254   | 0.858 [0.774; 0.958] | 0.844 [0.794; 0.937] | 0.859 [0.777; 0.954] | 1.325; 0.7233 |

**Note.** Kruskal-Wallis test values are given to compare four groups: control group, HER2 (+), HER2 (++) and HER2 (+++).  
\* - differences are statistically significant at p<0.05; \*\* - differences are statistically significant at p<0.10; \*\*\* - differences between HER2 (+) and HER2 (++) are statistically significant, p<0.05.

**Table S5.** Biochemical composition of saliva in ER-positive and ER-negative breast cancer

| Indicator                    | ER-negative, n=77       | p-value<br>ER-neg vs.<br>Control | ER-positive, n=359     | p-value<br>ER-pos vs.<br>Control | p-value<br>ER-neg vs.<br>ER-pos |
|------------------------------|-------------------------|----------------------------------|------------------------|----------------------------------|---------------------------------|
| pH                           | 6.46 [6.22; 6.68]       | 0.4485                           | 6.48 [6.22; 6.73]      | 0.8982                           | 0.4863                          |
| Calcium, mmol/L              | 1.14 [0.69; 1.44]       | 0.0103*                          | 1.25 [0.90; 1.64]      | 0.3553                           | 0.0625*                         |
| Phosphorus, mmol/L           | 4.33 [2.98; 5.95]       | 0.7185                           | 4.66 [3.57; 5.96]      | 0.0556**                         | 0.1845                          |
| Ca/P-ratio, c.u.             | 0.26 [0.19; 0.36]       | 0.0545**                         | 0.27 [0.19; 0.36]      | 0.0106*                          | 0.6363                          |
| Sodium, mmol/L               | 8.3 [5.5; 12.9]         | 0.9632                           | 7.6 [4.6; 12.5]        | 0.1082                           | 0.3395                          |
| Potassium, mmol/L            | 11.6 [9.0; 14.8]        | 0.6514                           | 11.0 [8.1; 14.2]       | 0.9953                           | 0.8237                          |
| Na/K-ratio, c.u.             | 0.71 [0.47; 1.26]       | 0.7949                           | 0.65 [0.47; 1.04]      | 0.0650**                         | 0.4526                          |
| Chlorides, mmol/L            | 26.3 [21.6; 32.3]       | 0.5685                           | 25.6 [19.8; 32.2]      | 0.9170                           | 0.6564                          |
| Magnesium, mmol/L            | 0.282 [0.209; 0.366]    | 0.3734                           | 0.297 [0.229; 0.377]   | 0.9227                           | 0.4610                          |
| NO, µmol/L                   | 28.0 [16.8; 42.2]       | 0.0978**                         | 29.1 [17.7; 47.2]      | 0.0036*                          | 0.8633                          |
| Protein, mg/mL               | 0.64 [0.36; 1.08]       | 0.0914**                         | 0.62 [0.36; 1.04]      | 0.0014*                          | 0.8021                          |
| Urea, mmol/L                 | 9.66 [6.33; 12.71]      | 0.0000*                          | 9.61 [6.22; 13.77]     | 0.0000*                          | 0.6671                          |
| Uric acid, µmol/L            | 80.77 [20.64; 133.33]   | 0.1130                           | 63.91 [24.75; 136.11]  | 0.0019*                          | 0.8248                          |
| Lactic acid, mmol/L          | 1.59 [1.39; 2.14]       | 0.9917                           | 1.66 [1.41; 2.03]      | 0.8506                           | 0.8928                          |
| Pyruvic acid, µmol/L         | 14.46 [8.82; 20.10]     | 0.6887                           | 13.97 [9.80; 19.12]    | 0.8395                           | 0.7519                          |
| Albumin, mg/mL               | 0.286 [0.154; 0.528]    | 0.8042                           | 0.305 [0.181; 0.560]   | 0.2616                           | 0.6645                          |
| α-Aminoacids, mmol/L         | 4.24 [3.85; 4.69]       | 0.0039*                          | 4.23 [3.90; 4.81]      | 0.0000*                          | 0.3322                          |
| Imidazole compounds, mmol/L  | 0.288 [0.228; 0.379]    | 0.9206                           | 0.281 [0.175; 0.410]   | 0.6032                           | 0.6317                          |
| Sialic acids, mmol/L         | 0.204 [0.122; 0.269]    | 0.6400                           | 0.201 [0.140; 0.281]   | 0.0653**                         | 0.6340                          |
| Seromucoids, c.u.            | 0.096 [0.073; 0.144]    | 0.3145                           | 0.098 [0.061; 0.159]   | 0.1379                           | 0.8826                          |
| ALT, U/L                     | 3.92 [2.62; 5.00]       | 0.9504                           | 3.92 [2.77; 5.15]      | 0.4691                           | 0.6343                          |
| AST, U/L                     | 6.25 [4.00; 8.50]       | 0.1093                           | 6.00 [4.08; 8.17]      | 0.0358*                          | 0.7458                          |
| AST/ALT-ratio, c.u.          | 1.69 [1.06; 2.17]       | 0.0697**                         | 1.47 [1.17; 1.90]      | 0.1478                           | 0.2023                          |
| LDH, U/L                     | 1641.0 [1024.0; 2142.0] | 0.0009*                          | 1418.5 [837.2; 2044.0] | 0.0013*                          | 0.0788**                        |
| ALP, U/L                     | 78.23 [54.33; 119.52]   | 0.0020*                          | 71.71 [45.63; 104.30]  | 0.0761**                         | 0.0502**                        |
| GGT, U/L                     | 22.8 [20.2; 25.9]       | 0.0046*                          | 23.3 [20.0; 26.4]      | 0.0000*                          | 0.3327                          |
| Catalase, nkat/mL            | 3.74 [2.48; 0.13]       | 0.0228*                          | 3.70 [2.53; 5.80]      | 0.0001*                          | 0.9633                          |
| Superoxide dismutase, c.u.   | 69.7 [44.7; 117.1]      | 0.0658**                         | 73.7 [31.6; 142.1]     | 0.0113*                          | 0.9779                          |
| α-Amylase, U/L               | 228.7 [117.6; 596.8]    | 0.0937**                         | 318.7 [119.6; 603.7]   | 0.0003*                          | 0.7395                          |
| Antioxidant activity, mmol/L | 2.36 [1.49; 3.34]       | 0.4474                           | 2.34 [1.47; 3.51]      | 0.3401                           | 0.7781                          |
| Peroxidase, c.u.             | 0.515 [0.330; 0.935]    | 0.0114*                          | 0.410 [0.230; 0.830]   | 0.1845                           | 0.0956**                        |
| SOD/Catalase-ratio, c.u.     | 20.7 [7.7; 37.5]        | 0.0220*                          | 20.8 [8.4; 41.5]       | 0.0005*                          | 0.8923                          |
| SOD/Peroxidase-ratio, c.u.   | 112.2 [28.6; 186.1]     | 0.2820                           | 143.9 [68.1; 315.8]    | 0.1892                           | 0.0445*                         |
| Diene conjugates, c.u.       | 3.99 [3.75; 4.25]       | 0.2807                           | 3.91 [3.70; 4.11]      | 0.0501**                         | 0.0358*                         |
| Triene conjugates, c.u.      | 0.905 [0.784; 0.995]    | 0.5210                           | 0.891 [0.800; 1.016]   | 0.1766                           | 0.7168                          |

|                        |                      |         |                      |          |         |
|------------------------|----------------------|---------|----------------------|----------|---------|
| Schiff bases, c.u.     | 0.530 [0.488; 0.665] | 0.2013  | 0.540 [0.479; 0.652] | 0.0804*  | 0.6228  |
| MDA, $\mu\text{mol/L}$ | 8.33 [6.20; 9.96]    | 0.0003* | 7.01 [5.81; 8.72]    | 0.0407*  | 0.0194* |
| SB/(DC+TC)-ratio, c.u. | 0.110 [0.100; 0.130] | 0.5976  | 0.111 [0.101; 0.129] | 0.1646   | 0.7925  |
| SB/TC-ratio, c.u.      | 0.632 [0.574; 0.717] | 0.0109* | 0.615 [0.556; 0.685] | 0.1208   | 0.1206  |
| MM 254, c.u.           | 0.275 [0.167; 0.422] | 0.6308  | 0.243 [0.165; 0.369] | 0.2330   | 0.3487  |
| MM 280, c.u.           | 0.218 [0.146; 0.352] | 0.8419  | 0.197 [0.140; 0.322] | 0.3656   | 0.5111  |
| MM 280/254             | 0.857 [0.779; 0.948] | 0.5785  | 0.861 [0.783; 0.965] | 0.0979** | 0.6442  |

**Note.** \* - differences are statistically significant at  $p < 0.05$ ; \*\* - differences are statistically significant at  $p < 0.10$ .

**Table S6.** Biochemical composition of saliva in ER-positive (+, ++, +++) breast cancer

| Indicators                      | ER (+), n=60             | ER (++), n=77            | ER (+++), n=222        | Kruskal-Wallis test (H, p) |
|---------------------------------|--------------------------|--------------------------|------------------------|----------------------------|
| pH                              | 6.49 [6.20; 6.75]        | 6.55 [6.29; 6.79]        | 6.48 [6.22; 6.70]      | 2.874; 0.4115              |
| Calcium, mmol/L                 | 1.20 [0.92; 1.67]        | 1.37 [0.95; 1.77]***     | 1.24 [0.84; 1.59]      | 3.208; 0.3606              |
| Phosphorus, mmol/L              | 4.90 [4.06; 5.94]***     | 4.68 [3.96; 6.68]***     | 4.43 [3.45; 5.88]      | 7.605; 0.0549**            |
| Ca/P-ratio, c.u.                | 0.24 [0.19; 0.34]        | 0.28 [0.20; 0.37]        | 0.27 [0.19; 0.37]      | 2.703; 0.4396              |
| Sodium, mmol/L                  | 6.9 [5.1; 11.5]          | 8.1 [5.6; 13.4]          | 7.4 [4.4; 12.5]        | 7.157; 0.0671**            |
| Potassium, mmol/L               | 12.0 [8.5; 14.8]         | 10.6 [8.2; 14.7]         | 11.0 [8.0; 14.1]       | 1.279; 0.7341              |
| Na/K-ratio, c.u.                | 0.65 [0.43; 0.90]        | 0.65 [0.52; 1.09]        | 0.65 [0.47; 1.03]      | 8.146; 0.0431*             |
| Chlorides, mmol/L               | 25.3 [20.2; 31.0]        | 27.8 [21.6; 36.2]***     | 24.9 [19.2; 31.6]      | 5.084; 0.1658              |
| Magnesium, mmol/L               | 0.304 [0.242; 0.367]     | 0.301 [0.221; 0.372]     | 0.293 [0.220; 0.383]   | 0.5012; 0.9186             |
| NO, $\mu\text{mol/L}$           | 28.6 [14.0; 48.6]        | 26.1 [16.6; 48.3]        | 31.2 [20.5; 43.5]      | 38.32; 0.0000*             |
| Protein, mg/mL                  | 0.80 [0.55; 1.24]***     | 0.72 [0.39; 1.21]***     | 0.55 [0.33; 0.93]      | 51.31; 0.0000*             |
| Urea, mmol/L                    | 9.03 [6.30; 12.70]       | 9.34 [6.08; 14.26]       | 9.78 [6.43; 13.94]     | 51.67; 0.0000*             |
| Uric acid, $\mu\text{mol/L}$    | 68.71 [25.96; 119.96]    | 87.50 [32.11; 165.14]*** | 55.77 [22.18; 133.03]  | 14.55; 0.0022*             |
| Lactic acid, mmol/L             | 1.72 [1.43; 1.95]        | 1.62 [1.41; 2.19]        | 1.66 [1.38; 2.03]      | 1.606; 0.6580              |
| Pyruvic acid, $\mu\text{mol/L}$ | 13.85 [10.29; 19.36]     | 14.58 [10.29; 18.38]     | 13.73 [9.44; 19.49]    | 2.165; 0.5388              |
| Albumin, mg/mL                  | 0.311 [0.157; 0.590]     | 0.361 [0.217; 0.623]***  | 0.278 [0.177; 0.495]   | 5.448; 0.1418              |
| $\alpha$ -Aminoacids, mmol/L    | 4.30 [3.91; 4.98]        | 4.23 [3.97; 4.98]        | 4.23 [3.88; 4.76]      | 31.40; 0.0000*             |
| Imidazole compounds, mmol/L     | 0.315 [0.190; 0.451]     | 0.269 [0.190; 0.395]     | 0.273 [0.167; 0.402]   | 6.622; 0.0850**            |
| Sialic acids, mmol/L            | 0.207 [0.159; 0.281]     | 0.192 [0.134; 0.262]     | 0.195 [0.140; 0.299]   | 2.760; 0.4301              |
| Seromucoids, c.u.               | 0.100 [0.072; 0.154]     | 0.107 [0.073; 0.172]***  | 0.093 [0.055; 0.152]   | 4.904; 0.1790              |
| ALT, U/L                        | 3.85 [2.62; 5.30]        | 3.73 [2.62; 5.08]        | 3.92 [2.92; 5.15]      | 0.4223; 0.9356             |
| AST, U/L                        | 5.75 [4.00; 8.92]        | 5.92 [3.71; 7.75]        | 6.17 [4.25; 8.13]      | 2.594; 0.4585              |
| AST/ALT-ratio, c.u.             | 1.51 [1.23; 1.84]        | 1.35 [1.15; 1.81]        | 1.48 [1.15; 1.90]      | 0.9801; 0.8061             |
| LDH, U/L                        | 1521.0 [885.3; 2044.0]   | 1357.0 [946.3; 2127.0]   | 1418.5 [761.4; 2022.0] | 4.336; 0.2274              |
| ALP, U/L                        | 74.97 [47.81; 107.56]*** | 82.57 [54.33; 123.86]*** | 63.02 [41.29; 99.96]   | 18.36; 0.0004*             |
| GGT, U/L                        | 24.8 [19.3; 27.4]        | 23.4 [19.9; 26.0]        | 23.3 [20.2; 26.1]      | 10.81; 0.0128*             |
| Catalase, nkat/mL               | 3.98 [2.00; 0.48]***     | 4.29 [2.85; 5.99]***     | 3.40 [2.44; 5.48]      | 26.38; 0.0000*             |
| Superoxide dismutase, c.u.      | 81.6 [31.6; 139.5]       | 81.6 [34.2; 161.8]       | 67.1 [31.6; 142.1]     | 5.063; 0.1673              |
| $\alpha$ -Amylase, U/L          | 413.3 [177.7; 798.0]     | 275.0 [101.1; 528.0]     | 304.9 [122.6; 579.0]   | 10.68; 0.0136*             |
| Antioxidant activity, mmol/L    | 2.55 [1.40; 3.83]        | 2.29 [1.48; 2.94]        | 2.32 [1.49; 3.38]      | 1.476; 0.6879              |
| Peroxidase, c.u.                | 0.335 [0.145; 0.730]     | 0.380 [0.230; 0.900]     | 0.430 [0.250; 0.830]   | 2.486; 0.4779              |
| SOD/Catalase-ratio, c.u.        | 21.8 [5.6; 41.7]         | 21.9 [7.9; 37.3]         | 19.8 [9.2; 39.9]       | 9.953; 0.0190*             |
| SOD/Peroxidase-ratio, c.u.      | 197.4 [90.8; 488.7]      | 139.8 [52.2; 423.3]      | 142.2 [65.8; 276.7]    | 3.404; 0.3334              |



|                         |                         |                         |                      |                 |
|-------------------------|-------------------------|-------------------------|----------------------|-----------------|
| Diene conjugates, c.u.  | 3.87 [3.69; 4.02]***    | 3.94 [3.73; 4.10]       | 3.92 [3.71; 4.18]    | 6.713; 0.0816** |
| Triene conjugates, c.u. | 0.917 [0.831; 1.076]*** | 0.913 [0.785; 1.013]    | 0.865 [0.787; 1.010] | 5.750; 0.1244   |
| Schiff bases, c.u.      | 0.556 [0.494; 0.712]    | 0.552 [0.486; 0.664]    | 0.531 [0.476; 0.624] | 5.387; 0.1456   |
| MDA, µmol/L             | 6.84 [5.73; 11.11]      | 7.14 [5.77; 8.72]       | 7.05 [5.81; 8.55]    | 16.89; 0.0007*  |
| SB/(DC+TC)-ratio, c.u.  | 0.114 [0.107; 0.143]*** | 0.111 [0.104; 0.133]    | 0.110 [0.099; 0.125] | 11.28; 0.0103*  |
| SB/TC-ratio, c.u.       | 0.592 [0.539; 0.695]    | 0.639 [0.560; 0.698]    | 0.620 [0.559; 0.680] | 3.957; 0.2661   |
| MM 254, c.u.            | 0.278 [0.182; 0.419]*** | 0.269 [0.167; 0.418]*** | 0.219 [0.163; 0.336] | 5.643; 0.1303   |
| MM 280, c.u.            | 0.214 [0.153; 0.348]    | 0.229 [0.145; 0.372]*** | 0.185 [0.130; 0.302] | 5.194; 0.1581   |
| MM 280/254              | 0.852 [0.756; 0.943]    | 0.867 [0.780; 0.943]    | 0.861 [0.792; 0.970] | 2.797; 0.4240   |

**Note.** \* - differences with the control group are statistically significant at p<0.05; \*\* - differences with the control group are statistically significant at p<0.10. Kruskal-Wallis test values are given to compare four groups: control group, ER (+), ER (++) and ER (+++). \*\*\* - Differences with ER (+++) are statistically significant, p<0.05.

**Table S7.** Biochemical composition of saliva in PR-positive and PR-negative breast cancer

| Indicators                  | PR-negative, n=125     | p-value<br>PR-neg vs.<br>Control | PR-positive, n=310     | p-value<br>PR-pos vs.<br>Control | p-value<br>PR-neg vs.<br>PR-pos |
|-----------------------------|------------------------|----------------------------------|------------------------|----------------------------------|---------------------------------|
| pH                          | 6.47 [6.20; 6.74]      | 0.5034                           | 6.49 [6.24; 6.72]      | 0.8889                           | 0.5826                          |
| Calcium, mmol/L             | 1.14 [0.84; 1.58]      | 0.0100*                          | 1.27 [0.90; 1.64]      | 0.4996                           | 0.0748**                        |
| Phosphorus, mmol/L          | 4.63 [3.44; 5.95]      | 0.3723                           | 4.64 [3.54; 5.96]      | 0.1219                           | 0.8559                          |
| Ca/P-ratio, c.u.            | 0.25 [0.18; 0.34]      | 0.0022*                          | 0.27 [0.19; 0.37]      | 0.0448*                          | 0.1325                          |
| Sodium, mmol/L              | 8.5 [5.4; 12.0]        | 0.9166                           | 7.4 [4.6; 12.9]        | 0.0798**                         | 0.2807                          |
| Potassium, mmol/L           | 11.6 [9.0; 14.7]       | 0.5519                           | 11.0 [8.1; 14.2]       | 0.9485                           | 0.6399                          |
| Na/K-ratio, c.u.            | 0.74 [0.49; 1.16]      | 0.6994                           | 0.63 [0.47; 1.02]      | 0.0446*                          | 0.2775                          |
| Chlorides, mmol/L           | 26.4 [21.6; 33.9]      | 0.2387                           | 25.6 [19.8; 31.6]      | 0.8321                           | 0.2495                          |
| Magnesium, mmol/L           | 0.298 [0.225; 0.382]   | 0.9436                           | 0.294 [0.222; 0.375]   | 0.6987                           | 0.8628                          |
| NO, µmol/L                  | 29.3 [19.3; 43.7]      | 0.0241*                          | 29.1 [16.9; 46.7]      | 0.0068*                          | 0.8939                          |
| Protein, mg/mL              | 0.66 [0.36; 1.00]      | 0.0122*                          | 0.61 [0.37; 1.08]      | 0.0047*                          | 0.7741                          |
| Urea, mmol/L                | 9.53 [6.25; 13.10]     | 0.0000*                          | 9.73 [6.25; 13.62]     | 0.0000*                          | 0.8671                          |
| Uric acid, µmol/L           | 80.77 [26.92; 139.58]  | 0.1531                           | 59.62 [22.28; 133.03]  | 0.0008*                          | 0.3039                          |
| Lactic acid, mmol/L         | 1.67 [1.38; 1.97]      | 0.8962                           | 1.63 [1.41; 2.07]      | 0.8873                           | 0.8765                          |
| Pyruvic acid, µmol/L        | 14.46 [10.05; 19.36]   | 0.6612                           | 13.97 [9.56; 19.12]    | 0.8389                           | 0.7960                          |
| Albumin, mg/mL              | 0.286 [0.153; 0.553]   | 0.8193                           | 0.311 [0.184; 0.556]   | 0.2175                           | 0.4851                          |
| α-Aminoacids, mmol/L        | 4.24 [3.85; 4.81]      | 0.0001*                          | 4.23 [3.91; 4.79]      | 0.0000*                          | 0.4614                          |
| Imidazole compounds, mmol/L | 0.277 [0.190; 0.379]   | 0.6074                           | 0.281 [0.182; 0.410]   | 0.7974                           | 0.7659                          |
| Sialic acids, mmol/L        | 0.207 [0.146; 0.281]   | 0.0741**                         | 0.195 [0.140; 0.275]   | 0.1855                           | 0.3356                          |
| Seromucoids, c.u.           | 0.095 [0.066; 0.163]   | 0.2755                           | 0.099 [0.062; 0.152]   | 0.1232                           | 0.9755                          |
| ALT, U/L                    | 3.96 [2.88; 5.00]      | 0.5317                           | 3.92 [2.77; 5.23]      | 0.6151                           | 0.7853                          |
| AST, U/L                    | 6.21 [4.42; 8.29]      | 0.0110*                          | 6.00 [4.08; 8.08]      | 0.0960**                         | 0.2229                          |
| AST/ALT-ratio, c.u.         | 1.56 [1.15; 2.05]      | 0.0407*                          | 1.46 [1.14; 1.91]      | 0.2244                           | 0.2234                          |
| LDH, U/L                    | 1496.5 [887.7; 2057.0] | 0.0059*                          | 1438.0 [837.2; 2088.0] | 0.0006*                          | 0.9100                          |
| ALP, U/L                    | 73.88 [47.81; 108.65]  | 0.0085*                          | 71.71 [47.81; 102.13]  | 0.0786**                         | 0.1954                          |
| GGT, U/L                    | 22.9 [19.5; 26.6]      | 0.0002*                          | 23.3 [20.2; 26.1]      | 0.0000*                          | 0.5323                          |
| Catalase, nkat/mL           | 3.89 [2.48; 6.13]      | 0.0209*                          | 3.65 [2.53; 5.83]      | 0.0001*                          | 0.7078                          |
| Superoxide dismutase, c.u.  | 75.0 [39.5; 144.7]     | 0.0202*                          | 71.1 [34.2; 140.8]     | 0.0222*                          | 0.6613                          |
| α-Amylase, U/L              | 276.7 [111.6; 596.8]   | 0.0892**                         | 320.8 [134.2; 611.4]   | 0.0001*                          | 0.3566                          |

|                              |                      |          |                      |          |        |
|------------------------------|----------------------|----------|----------------------|----------|--------|
| Antioxidant activity, mmol/L | 2.42 [1.43; 3.51]    | 0.7194   | 2.33 [1.49; 3.14]    | 0.2410   | 0.6279 |
| Peroxidase, c.u.             | 0.470 [0.260; 0.880] | 0.0964** | 0.420 [0.250; 0.830] | 0.1097   | 0.6692 |
| SOD/Catalase-ratio, c.u.     | 22.7 [7.3; 37.2]     | 0.0041*  | 19.8 [8.4; 41.5]     | 0.0012*  | 0.6328 |
| SOD/Peroxidase-ratio, c.u.   | 142.9 [47.2; 387.0]  | 0.5646   | 131.6 [65.8; 285.4]  | 0.4522   | 0.9507 |
| Diene conjugates, c.u.       | 3.86 [3.70; 4.10]    | 0.0492*  | 3.93 [3.72; 4.13]    | 0.4993   | 0.2597 |
| Triene conjugates, c.u.      | 0.898 [0.809; 0.990] | 0.3512   | 0.893 [0.791; 1.020] | 0.2028   | 0.9721 |
| Schiff bases, c.u.           | 0.519 [0.476; 0.650] | 0.8538   | 0.543 [0.485; 0.653] | 0.0214*  | 0.3872 |
| MDA, µmol/L                  | 7.18 [5.81; 9.91]    | 0.0172*  | 7.09 [5.90; 8.80]    | 0.0118*  | 0.4978 |
| SB/(DC+TC)-ratio, c.u.       | 0.110 [0.099; 0.129] | 0.9787   | 0.111 [0.102; 0.128] | 0.0924** | 0.4221 |
| SB/TC-ratio, c.u.            | 0.613 [0.553; 0.691] | 0.2206   | 0.625 [0.561; 0.694] | 0.0432*  | 0.9513 |
| MM 254, c.u.                 | 0.263 [0.164; 0.422] | 0.8145   | 0.245 [0.167; 0.366] | 0.2299   | 0.3695 |
| MM 280, c.u.                 | 0.216 [0.143; 0.371] | 0.7546   | 0.198 [0.139; 0.322] | 0.2963   | 0.3032 |
| MM 280/254                   | 0.869 [0.782; 0.954] | 0.2447   | 0.856 [0.780; 0.962] | 0.1669   | 0.7600 |

**Note.** \* - differences are statistically significant at  $p < 0.05$ ; \*\* - differences are statistically significant at  $p < 0.10$ .

**Table S8.** Biochemical composition of saliva in PR-positive (+, ++, +++) breast cancer

| Indicators                  | PR (+), n=64                   | PR (++) , n=79         | PR (+++), n=167        | Kruskal-Wallis test (H, p) |
|-----------------------------|--------------------------------|------------------------|------------------------|----------------------------|
| pH                          | 6.50 [6.29; 6.73]              | 6.48 [6.27; 6.72]      | 6.48 [6.22; 6.71]      | 0.3261; 0.9551             |
| Calcium, mmol/L             | 1.27 [0.98; 1.53]              | 1.37 [1.01; 1.86]****  | 1.25 [0.82; 1.57]      | 3.436; 0.3292              |
| Phosphorus, mmol/L          | 4.41 [3.80; 5.98]              | 4.79 [3.55; 6.45]      | 4.65 [3.41; 5.74]      | 3.672; 0.2991              |
| Ca/P-ratio, c.u.            | 0.27 [0.20; 0.36]              | 0.27 [0.20; 0.36]      | 0.27 [0.19; 0.37]      | 1.770; 0.6216              |
| Sodium, mmol/L              | 6.6 [4.9; 12.6]                | 6.6 [4.5; 13.1]        | 7.9 [4.6; 12.9]        | 3.121; 0.3733              |
| Potassium, mmol/L           | 11.3 [8.3; 14.1]               | 11.0 [8.1; 15.4]       | 11.0 [8.0; 14.1]       | 0.7834; 0.8534             |
| Na/K-ratio, c.u.            | 0.62 [0.46; 1.14]              | 0.59 [0.43; 0.94]      | 0.73 [0.49; 1.03]      | 6.448; 0.0918**            |
| Chlorides, mmol/L           | 26.9 [21.5; 33.0]              | 25.8 [20.6; 32.4]      | 24.9 [18.9; 31.2]      | 3.542; 0.3154              |
| Magnesium, mmol/L           | 0.296 [0.233; 0.375]           | 0.292 [0.210; 0.371]   | 0.296 [0.232; 0.376]   | 0.5763; 0.9018             |
| NO, µmol/L                  | 26.5 [14.6; 43.3]              | 24.9 [12.5; 48.4]****  | 33.9 [20.9; 47.5]      | 17.72; 0.0005*             |
| Protein, mg/mL              | 0.77 [0.51; 1.28]****          | 0.62 [0.31; 1.20]      | 0.57 [0.36; 0.98]      | 64.40; 0.0000*             |
| Urea, mmol/L                | 9.98 [6.38; 13.64]             | 9.34 [6.43; 13.62]     | 9.65 [6.08; 13.68]     | 57.05; 0.0000*             |
| Uric acid, µmol/L           | 74.46 [23.46; 136.04]          | 54.35 [22.94; 116.23]  | 56.49 [22.18; 143.56]  | 9.181; 0.0270*             |
| Lactic acid, mmol/L         | 1.60 [1.27; 2.03]              | 1.67 [1.49; 2.24]      | 1.63 [1.36; 1.99]      | 3.951; 0.2668              |
| Pyruvic acid, µmol/L        | 14.95 [10.29; 18.63]           | 14.58 [10.29; 21.32]   | 13.24 [8.82; 18.75]    | 3.751; 0.2896              |
| Albumin, mg/mL              | 0.386 [0.243; 0.646]***, ****  | 0.305 [0.197; 0.513]   | 0.270 [0.165; 0.485]   | 12.82; 0.0050*             |
| α-Aminoacids, mmol/L        | 4.33 [3.97; 4.78]              | 4.24 [3.90; 4.79]      | 4.20 [3.88; 4.84]      | 25.98; 0.0000*             |
| Imidazole compounds, mmol/L | 0.285 [0.193; 0.467]           | 0.285 [0.167; 0.395]   | 0.281 [0.190; 0.402]   | 3.181; 0.3646              |
| Sialic acids, mmol/L        | 0.195 [0.146; 0.275]           | 0.201 [0.134; 0.278]   | 0.192 [0.134; 0.275]   | 0.3868; 0.9430             |
| Seromucoids, c.u.           | 0.118 [0.088; 0.174]***, ****  | 0.096 [0.064; 0.139]   | 0.094 [0.055; 0.158]   | 10.42; 0.0153*             |
| ALT, U/L                    | 4.08 [2.62; 5.08]              | 3.69 [2.46; 4.46]****  | 4.00 [2.92; 5.38]      | 3.716; 0.2938              |
| AST, U/L                    | 6.33 [4.50; 8.58]              | 6.00 [4.08; 8.08]      | 5.92 [4.08; 7.92]      | 1.678; 0.6417              |
| AST/ALT-ratio, c.u.         | 1.59 [1.22; 2.09]****          | 1.61 [1.13; 2.15]****  | 1.36 [1.13; 1.77]      | 6.994; 0.0721**            |
| LDH, U/L                    | 1617.5 [826.8; 2082.5]         | 1457.0 [899.7; 2088.0] | 1419.0 [809.9; 2088.0] | 10.29; 0.0162*             |
| ALP, U/L                    | 84.75 [53.24; 126.03]***, **** | 69.54 [39.11; 99.96]   | 66.28 [45.63; 99.96]   | 12.87; 0.0049*             |
| GGT, U/L                    | 24.9 [20.9; 28.2]****          | 23.3 [21.0; 25.8]      | 22.6 [19.4; 25.7]      | 39.51; 0.0000*             |
| Catalase, nkat/mL           | 4.74 [2.81; 6.56]***, ****     | 3.36 [2.34; 5.29]      | 3.46 [2.47; 5.39]      | 19.46; 0.0002*             |



|                              |                          |                          |                      |                 |
|------------------------------|--------------------------|--------------------------|----------------------|-----------------|
| Superoxide dismutase, c.u.   | 78.9 [27.6; 140.8]       | 72.4 [47.4; 159.2]       | 65.8 [32.9; 139.5]   | 4.657; 0.1987   |
| $\alpha$ -Amylase, U/L       | 551.0 [256.8; 798.0]**** | 335.1 [116.5; 568.0]     | 285.3 [122.6; 528.0] | 18.57; 0.0003*  |
| Antioxidant activity, mmol/L | 2.64 [1.63; 3.38]        | 2.52 [1.61; 3.35]        | 2.17 [1.42; 2.98]    | 2.994; 0.3926   |
| Peroxidase, c.u.             | 0.550 [0.290; 0.750]***  | 0.290 [0.210; 0.510]**** | 0.490 [0.250; 0.930] | 5.971; 0.1130   |
| SOD/Catalase-ratio, c.u.     | 15.5 [4.9; 40.8]***      | 23.3 [10.9; 48.8]        | 19.8 [8.2; 35.7]     | 8.615; 0.0349*  |
| SOD/Peroxidase-ratio, c.u.   | 103.7 [52.6; 150.4]***   | 237.0 [137.8; 550.2]**** | 126.5 [57.6; 231.7]  | 12.30; 0.0064*  |
| Diene conjugates, c.u.       | 3.94 [3.69; 4.10]        | 3.93 [3.71; 4.12]        | 3.93 [3.74; 4.17]    | 0.6841; 0.8769  |
| Triene conjugates, c.u.      | 0.869 [0.796; 1.010]     | 0.853 [0.777; 1.013]     | 0.904 [0.810; 1.030] | 2.646; 0.4495   |
| Schiff bases, c.u.           | 0.521 [0.478; 0.623]     | 0.534 [0.477; 0.634]     | 0.557 [0.493; 0.678] | 4.014; 0.2599   |
| MDA, $\mu$ mol/L             | 7.22 [6.15; 9.83]        | 7.22 [6.15; 9.83]        | 7.01 [5.73; 8.46]    | 15.74; 0.0013*  |
| SB/(DC+TC)-ratio, c.u.       | 0.109 [0.103; 0.126]     | 0.110 [0.100; 0.128]     | 0.113 [0.103; 0.134] | 2.464; 0.4818   |
| SB/TC-ratio, c.u.            | 0.593 [0.548; 0.695]     | 0.629 [0.571; 0.684]     | 0.627 [0.561; 0.704] | 3.053; 0.3836   |
| MM 254, c.u.                 | 0.273 [0.179; 0.398]     | 0.261 [0.180; 0.372]     | 0.220 [0.145; 0.349] | 6.741; 0.0806** |
| MM 280, c.u.                 | 0.196 [0.147; 0.348]     | 0.218 [0.147; 0.360]     | 0.185 [0.125; 0.290] | 5.498; 0.1388   |
| MM 280/254                   | 0.849 [0.764; 0.933]     | 0.859 [0.801; 0.974]     | 0.852 [0.779; 0.967] | 3.601; 0.3079   |

**Note.** \* - differences are statistically significant at  $p < 0.05$ ; \*\* - differences are statistically significant at  $p < 0.10$ . Kruskal-Wallis test values are given to compare four groups: control group, ER (+), ER (++) and ER (+++). \*\*\* - Differences with PR (++) are statistically significant,  $p < 0.05$ ; \*\*\*\* - differences with PR (+++) are statistically significant,  $p < 0.05$ .

**Table S9.** Biochemical composition of saliva in ER/PR-positive and ER/PR-negative breast cancer

| Indicators                   | ER-negative + PR-negative, n=67 | ER-positive + PR-positive, n=301 | Kruskal-Wallis test (H, p) |
|------------------------------|---------------------------------|----------------------------------|----------------------------|
| pH                           | 6.47 [6.22; 6.71]               | 6.50 [6.26; 6.72]                | 0.2444; 0.8850             |
| Calcium, mmol/L              | 1.15 [0.67; 1.48]***, ****      | 1.28 [0.90; 1.64]                | 3.974; 0.1371              |
| Phosphorus, mmol/L           | 4.33 [2.75; 6.14]               | 4.64 [3.54; 5.97]                | 1.848; 0.3969              |
| Ca/P-ratio, c.u.             | 0.257 [0.186; 0.370]            | 0.273 [0.195; 0.369]             | 2.108; 0.3485              |
| Sodium, mmol/L               | 8.17 [5.37; 12.51]              | 7.40 [4.55; 12.91]***            | 4.796; 0.0909**            |
| Potassium, mmol/L            | 11.85 [9.11; 14.85]             | 11.04 [8.07; 14.20]              | 0.5164; 0.7724             |
| Na/K-ratio, c.u.             | 0.706 [0.455; 1.113]            | 0.635 [0.466; 1.024]***          | 6.813; 0.0332*             |
| Chlorides, mmol/L            | 26.42 [21.94; 33.25]            | 25.60 [19.78; 31.76]             | 1.135; 0.5668              |
| Magnesium, mmol/L            | 0.282 [0.209; 0.398]            | 0.294 [0.222; 0.379]             | 0.2629; 0.8768             |
| NO, $\mu$ mol/L              | 30.09 [19.30; 41.75]***         | 29.12 [17.37; 46.84]***          | 21.86; 0.0000*             |
| Protein, mg/mL               | 0.71 [0.36; 1.09]***            | 0.61 [0.37; 1.09]***             | 48.78; 0.0000*             |
| Urea, mmol/L                 | 9.53 [5.79; 12.71]***           | 9.65 [6.22; 13.68]***            | 63.67; 0.0000*             |
| Uric acid, $\mu$ mol/L       | 86.63 [23.81; 139.58]           | 62.50 [23.14; 136.04]***         | 13.58; 0.0011*             |
| Lactic acid, mmol/L          | 1.67 [1.38; 2.14]               | 1.64 [1.38; 2.07]                | 1.591; 0.4514              |
| Pyruvic acid, $\mu$ mol/L    | 14.46 [11.03; 20.59]            | 13.97 [9.80; 19.12]              | 2.402; 0.3009              |
| Albumin, mg/mL               | 0.286 [0.154; 0.553]            | 0.312 [0.184; 0.559]             | 0.2845; 0.8674             |
| $\alpha$ -Aminoacids, mmol/L | 4.27 [3.84; 4.86]***            | 4.23 [3.91; 4.82]***             | 33.19; 0.0000*             |
| Imidazole compounds, mmol/L  | 0.300 [0.228; 0.379]            | 0.281 [0.186; 0.410]***          | 4.073; 0.1305              |
| Sialic acids, mmol/L         | 0.204 [0.128; 0.281]            | 0.195 [0.140; 0.281]             | 1.273; 0.5293              |
| Seromucoids, c.u.            | 0.096 [0.072; 0.152]            | 0.095 [0.061; 0.155]             | 1.263; 0.5318              |
| ALT, U/L                     | 4.08 [2.62; 5.38]               | 3.92 [2.77; 5.23]                | 0.3041; 0.8590             |
| AST, U/L                     | 6.50 [4.67; 8.50]               | 6.00 [4.08; 8.17]                | 1.302; 0.5216              |
| AST/ALT-ratio, c.u.          | 1.68 [1.11; 2.12]               | 1.46 [1.15; 1.90]                | 1.517; 0.4683              |
| LDH, U/L                     | 1687.0 [1024.0; 2217.0]***      | 1427.0 [837.7; 2088.0]***        | 8.423; 0.0148*             |

|                              |                                            |                                      |                 |
|------------------------------|--------------------------------------------|--------------------------------------|-----------------|
| ALP, U/L                     | 82.57 [52.15; 119.52] <sup>***, ****</sup> | 71.71 [46.72; 102.13] <sup>***</sup> | 14.30; 0.0008*  |
| GGT, U/L                     | 22.4 [19.8; 26.5]                          | 23.3 [20.1; 26.1] <sup>***</sup>     | 14.30; 0.0008*  |
| Catalase, nkat/mL            | 3.82 [2.37; 6.37] <sup>***</sup>           | 3.66 [2.53; 5.83] <sup>***</sup>     | 26.82; 0.0000*  |
| Superoxide dismutase, c.u.   | 72.37 [47.37; 147.37]                      | 71.05 [34.21; 142.11] <sup>***</sup> | 3.769; 0.1519   |
| $\alpha$ -Amylase, U/L       | 260.2 [116.5; 622.2]                       | 323.3 [134.2; 611.4] <sup>***</sup>  | 14.70; 0.0006*  |
| Antioxidant activity, mmol/L | 2.14 [1.52; 3.33]                          | 2.32 [1.49; 3.14]                    | 0.3081; 0.8572  |
| Peroxidase, c.u.             | 0.575 [0.360; 1.120] <sup>***, ****</sup>  | 0.430 [0.250; 0.830]                 | 4.843; 0.0888** |
| SOD/Catalase-ratio, c.u.     | 22.36 [7.32; 37.77] <sup>***</sup>         | 20.07 [8.38; 41.54] <sup>***</sup>   | 11.16; 0.0038*  |
| SOD/Peroxidase-ratio, c.u.   | 105.96 [26.32; 204.68]                     | 131.58 [66.92; 296.52]               | 3.504; 0.1734   |
| Diene conjugates, c.u.       | 3.99 [3.79; 4.25]                          | 3.93 [3.72; 4.13]                    | 2.638; 0.2674   |
| Triene conjugates, c.u.      | 0.902 [0.784; 1.000]                       | 0.891 [0.793; 1.020]                 | 1.909; 0.3849   |
| Schiff bases, c.u.           | 0.530 [0.488; 0.735]                       | 0.544 [0.486; 0.653]                 | 0.9348; 0.6266  |
| MDA, $\mu$ mol/L             | 8.38 [6.15; 10.17] <sup>***, ****</sup>    | 7.09 [5.81; 8.72] <sup>***</sup>     | 21.40; 0.0000*  |
| SB/(DC+TC)-ratio, c.u.       | 0.110 [0.099; 0.130]                       | 0.111 [0.102; 0.129]                 | 2.649; 0.2660   |
| SB/TC-ratio, c.u.            | 0.639 [0.569; 0.732] <sup>***</sup>        | 0.627 [0.561; 0.694]                 | 2.949; 0.2289   |
| MM 254, c.u.                 | 0.295 [0.177; 0.426]                       | 0.247 [0.167; 0.364]                 | 2.563; 0.2776   |
| MM 280, c.u.                 | 0.238 [0.157; 0.380]                       | 0.201 [0.141; 0.322]                 | 2.878; 0.2371   |
| MM 280/254                   | 0.861 [0.777; 0.952]                       | 0.857 [0.780; 0.965]                 | 0.2256; 0.8933  |

**Note.** Kruskal-Wallis test values are given to compare three groups: control group, ER/PR-positive and ER/PR-negative breast cancer. \* - differences are statistically significant at  $p < 0.05$ ; \*\* - differences are statistically significant at  $p < 0.10$ . \*\*\* - Differences with control group are statistically significant,  $p < 0.05$ ; \*\*\*\* - differences between ER/PR-positive and ER/PR-negative breast cancer are statistically significant,  $p < 0.05$ .
